# Supplementary material
Source: PubMed Central journal article supplement (PMC6829583)

**Figure S1: Control for effects of electrode insertion into the amygdala on 10% CO<sub>2</sub>-evoked behaviors.** The sham controls run in parallel with lesioned mice did not have electrodes inserted into their brains. To control for the effects of electrode insertion in the amygdala, we tested the effects of electrode insertion on 10% CO<sub>2</sub>-evoked behaviors in a new group of controls post hoc. Neither freezing ( $t = 0.5111$ ,  $p = 0.6142$ ,  $n = 7$ ) nor jumping ( $p = 0.2678$ ) differed significantly from previously run sham controls without electrode insertion.

**Figure S2: Nissl Staining of amygdala Lesion.** Nissl staining showing the amygdala of a sham control (A) and the extent of a typical amygdala lesion (B). Atlas provided for reference [58].

**Figure S3: Unilateral amygdala lesions elicit 10% CO<sub>2</sub>-evoked jumping.** A) Mice with unilateral amygdala lesions (x1) displayed similar freezing in response to 10% CO<sub>2</sub> as sham controls ( $p = 0.5831$ ,  $n = 6$ ), but more freezing than mice with bilateral amygdala lesions (x2) (\*\* $p = 0.0016$ ), sham and bilateral data from **Figure 1B** shown for reference. B) Mice with unilateral amygdala lesions displayed similar jumping in response to 10% CO<sub>2</sub> as mice with bilateral amygdala lesions (x2) ( $p = 0.3747$ ), but more jumping than sham controls (\* $p = 0.0227$ ), sham and bilateral data from **Figure 1C** shown for reference

**Figure S4: Effect of electrolytic lesions on gross locomotion.** One-way ANOVA revealed a significant difference ( $F(4,56) = 3.415$ ,  $p = 0.0144$ ,  $n = 27, 7, 11, 8, 8$ ). Dunnett's multiple comparison test revealed no effect of amygdala ( $p = 0.9568$ ), BNST ( $p = 0.7365$ ), or dPAG ( $p = 0.9990$ ) on locomotion in the open field, whereas dorsal hippocampus lesions increase locomotor activity (\* $p = 0.0105$ ).

**Figure S5: Extent of electrolytic lesions.** Diagrams [58] showing location and extent of the largest (red) and smallest (blue) BNST (A), dorsal hippocampus (B) dPAG (C) lesions.



Figure S2

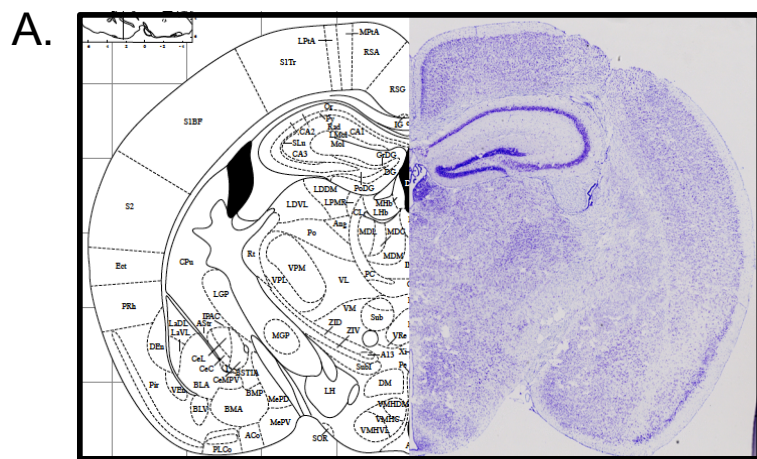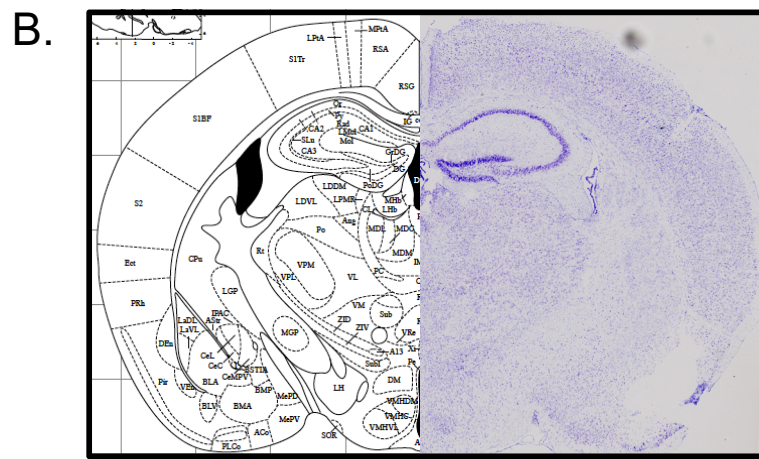



Figure S4

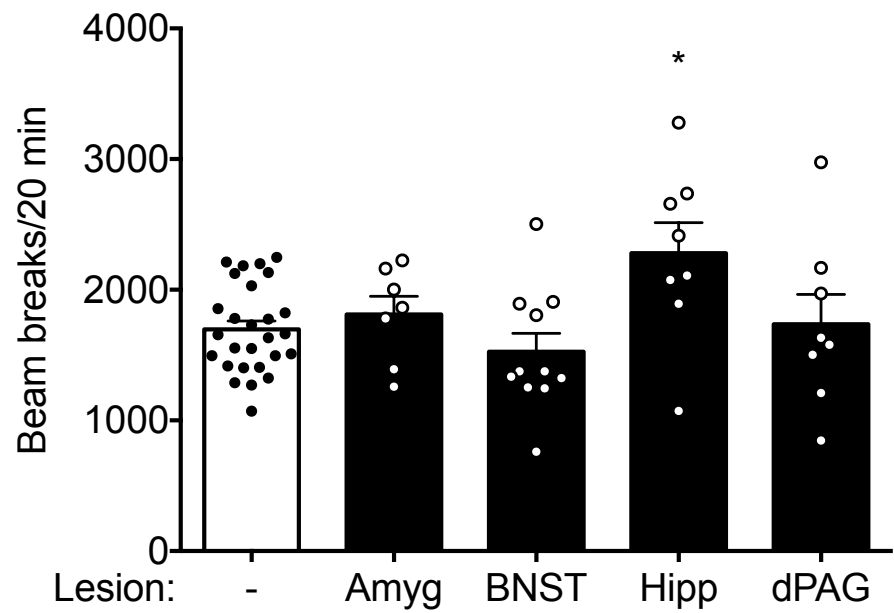

A.

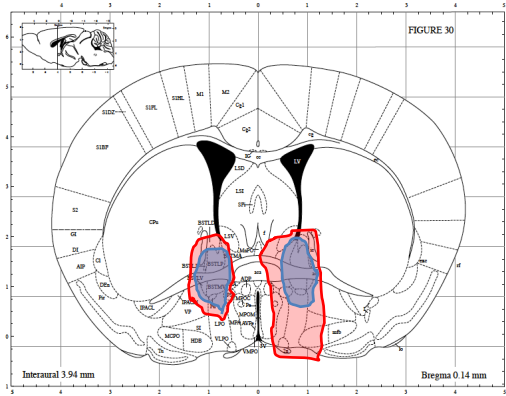

B.

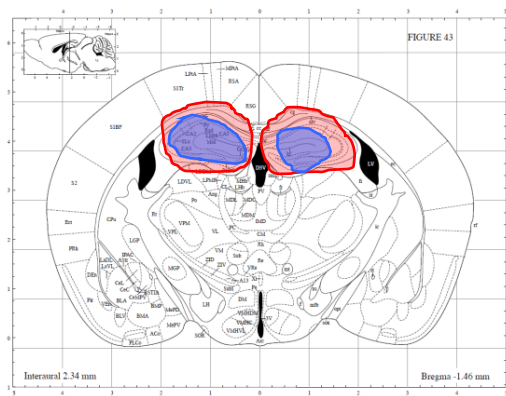

C.

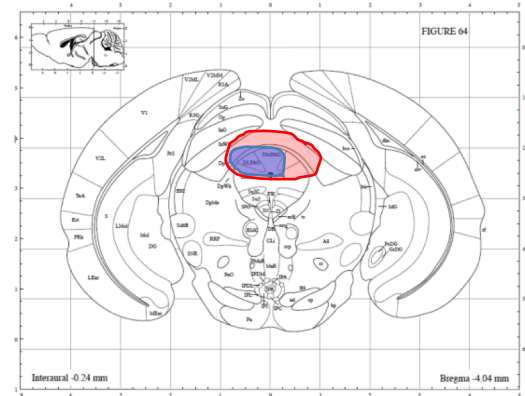

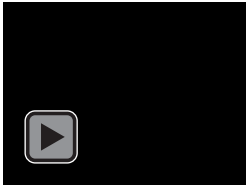

Supplement: NIHMS1055606-supplement-Supplemental_Material.pdf [file NIHMS1055606-supplement-Supplemental_Material.pdf]
